# Supplementary material for: Solid-state synthesis of ordered mesoporous carbon catalysts via a mechanochemical assembly through coordination cross-linking
Source: PubMed Central journal article supplement (PMC5477501; doi:10.1038/ncomms15020), 2017-04-28
Supplement: ncomms15020-s1.pdf [file ncomms15020-s1.pdf]

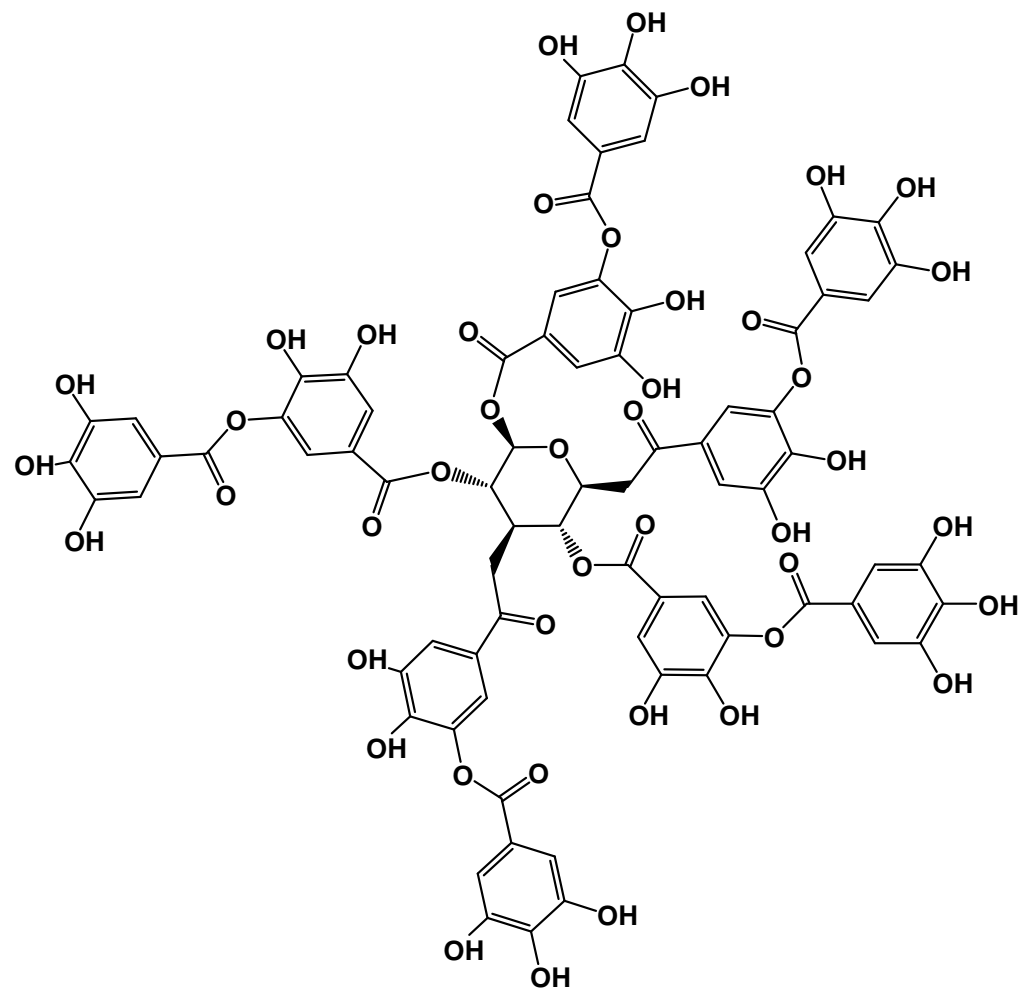

**Supplementary Figure 1.** The chemical structure of tannin acid (CAS: 1401-55-4)—a typical form of tannins.

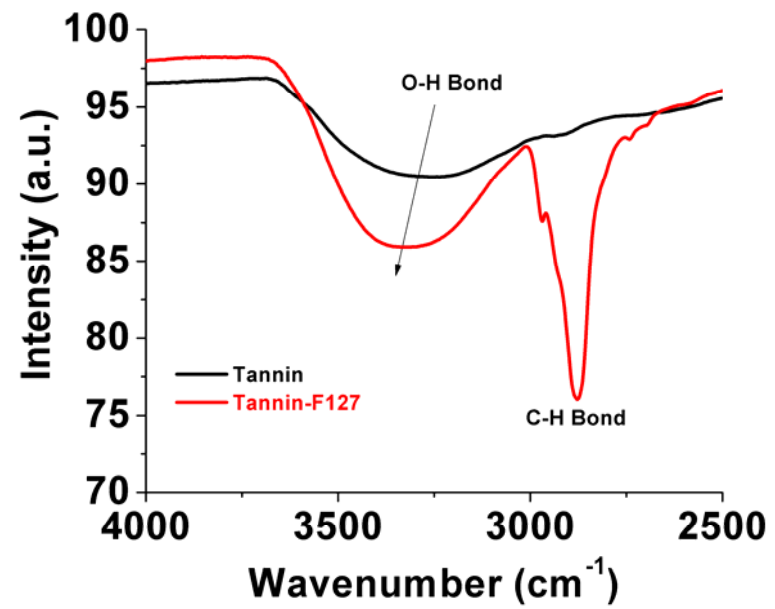

**Supplementary Figure 2.** FTIR spectra of tannin, and tannin-F127 composite (1 g-1 g) by ball milling for 0.5 h.

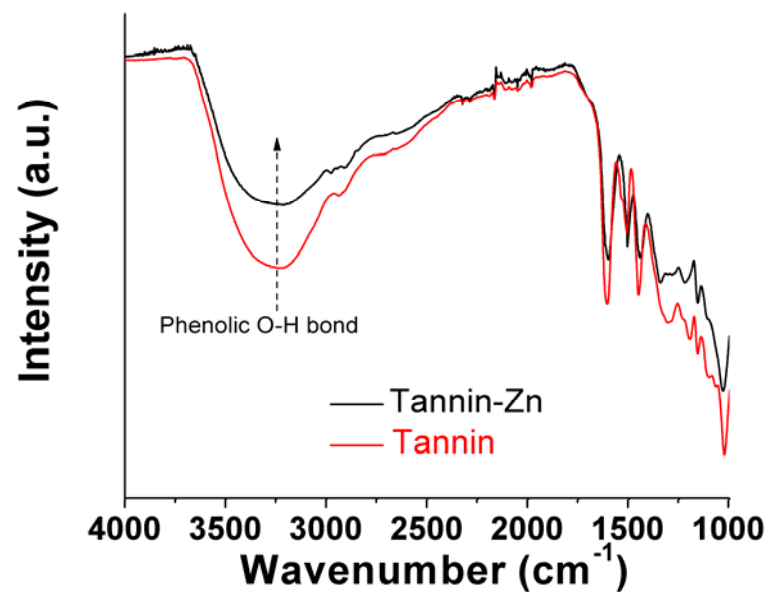

**Supplementary Figure 3.** Fourier transform infrared (FTIR) spectra of tannin, and tannin-Zn polymer (1 g-3 mmol) by ball milling for 0.5 h. The coordination between tannin and Zn<sup>2+</sup> ion was suggested by the decrease of phenolic O-H vibrational peaks in FTIR for tannin-Zn sample, though a hump peak related to -OH group remained. There are still one or two -OH groups left in the pyrogallol- or catechol-like rings after the coordination polymerization.

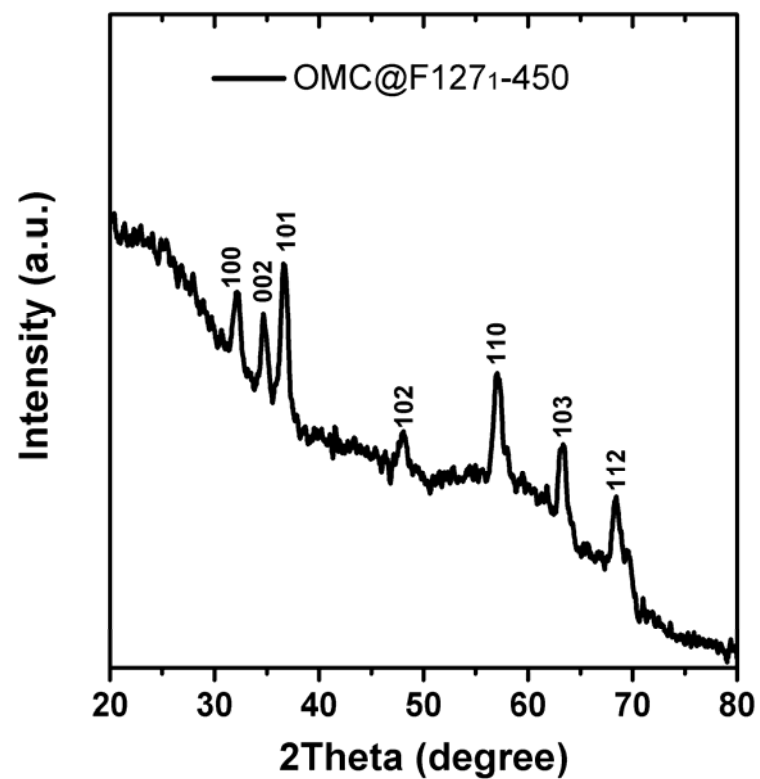

**Supplementary Figure 4.** XRD pattern of OMC@F1271-450 sample. The diffraction peaks match well with ZnO (JCPDS: 36-1451), revealing that the tannin-Zn polymer with -PhO-Zn-OPh- coordination has transformed into ZnO-carbon at 450°C.

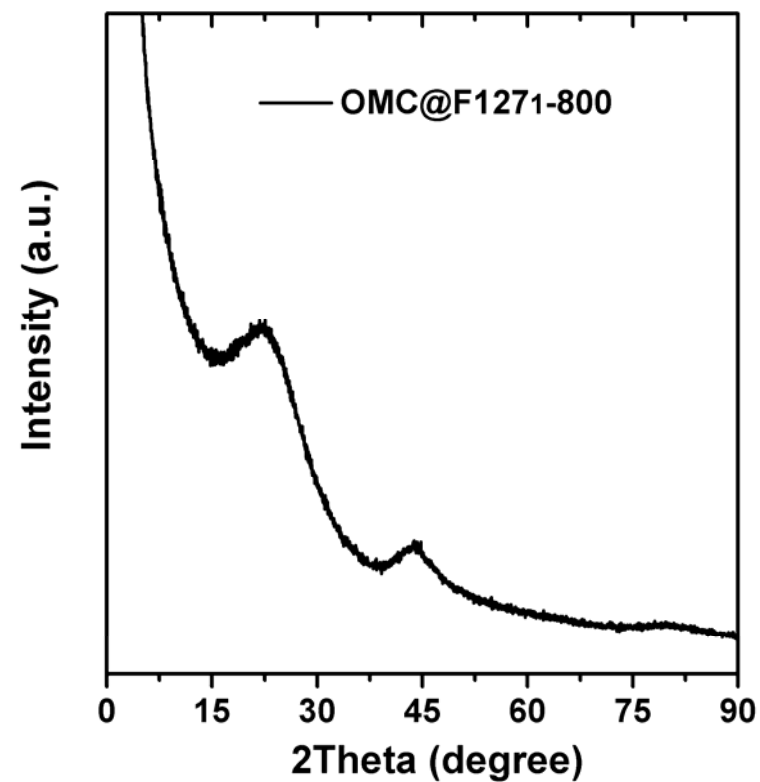

**Supplementary Figure 5.** XRD pattern of OMC@F1271-800 sample. The broad peaks at  $\sim 22^\circ$  and  $\sim 44^\circ$  correspond to the (002) and (100) reflection of the graphitic-type amorphous carbon. No responses relating to Zn or ZnO have been observed, suggesting the evaporation of Zn during high temperature carbonization.

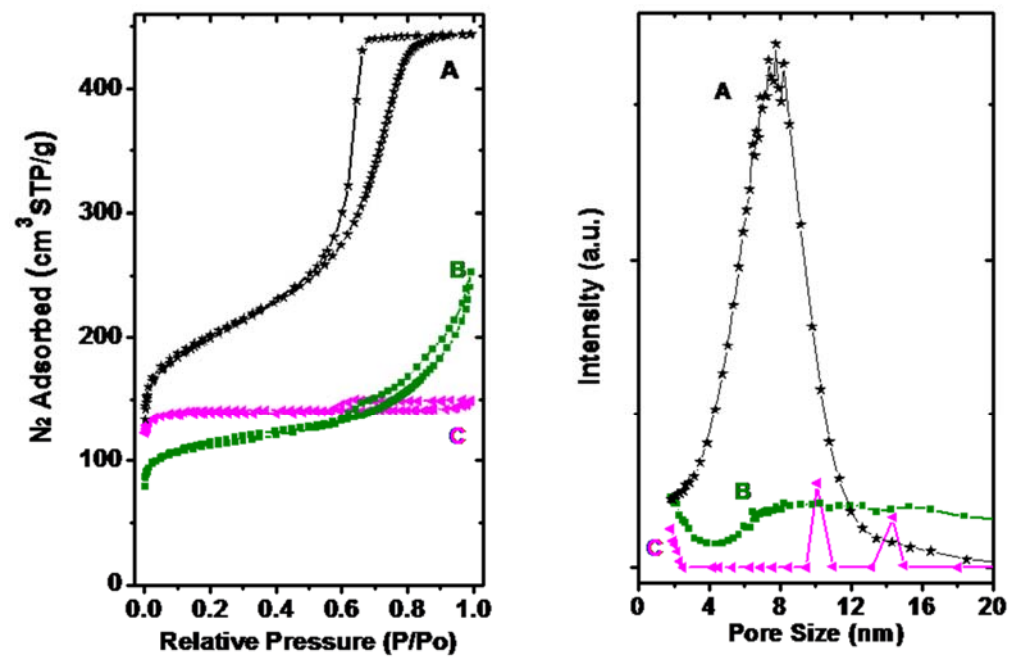

**A: Tannin-F127-Zn (OMC@F127<sub>1</sub>-800)**

**B: Tannin-F127**

**C: Tannin-Zn**

**Supplementary Figure 6.** Nitrogen adsorption-desorption isotherms (77 K) of control samples and the pore size distributions.

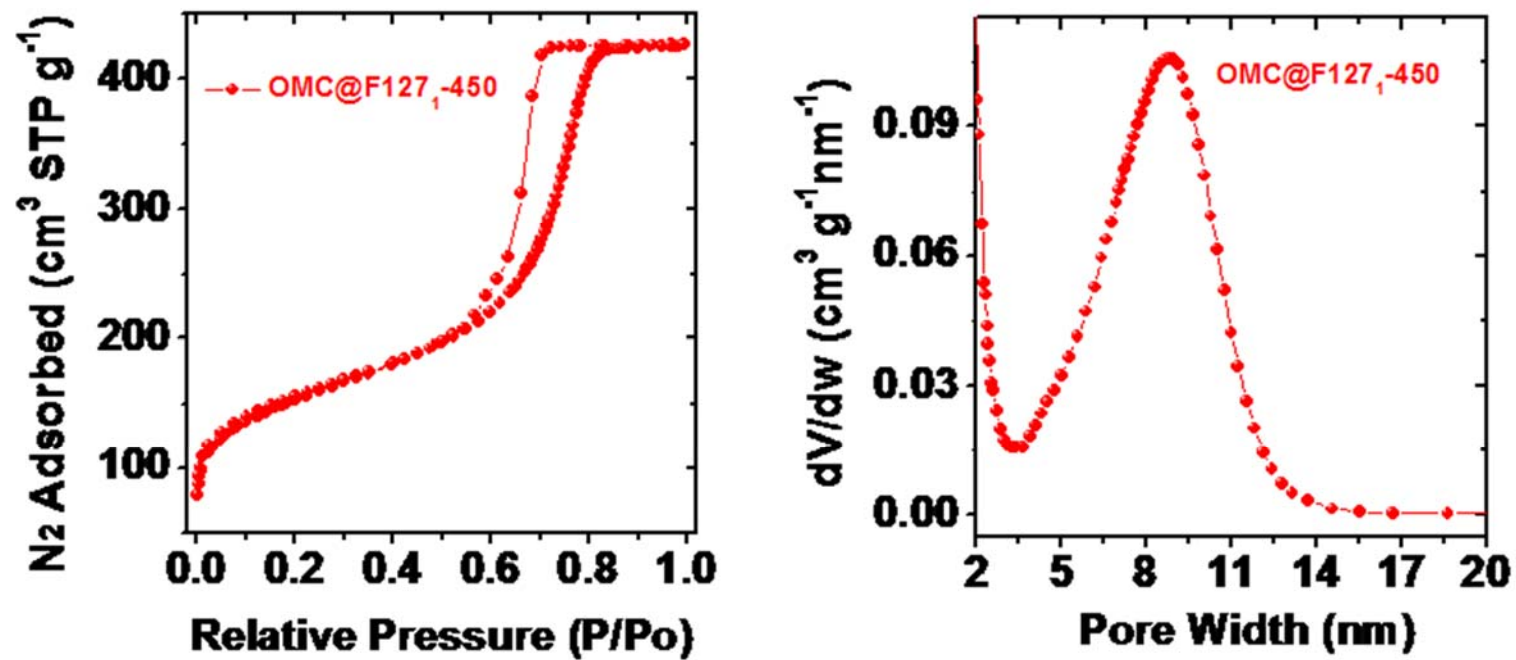

**Supplementary Figure 7.** Nitrogen adsorption-desorption isotherm of OMC@F127<sub>1</sub>-450 sample at 77 K. A narrow pore size distribution around 8 nm was got. The ordered mesopores have already formed by calcination at 450°C.

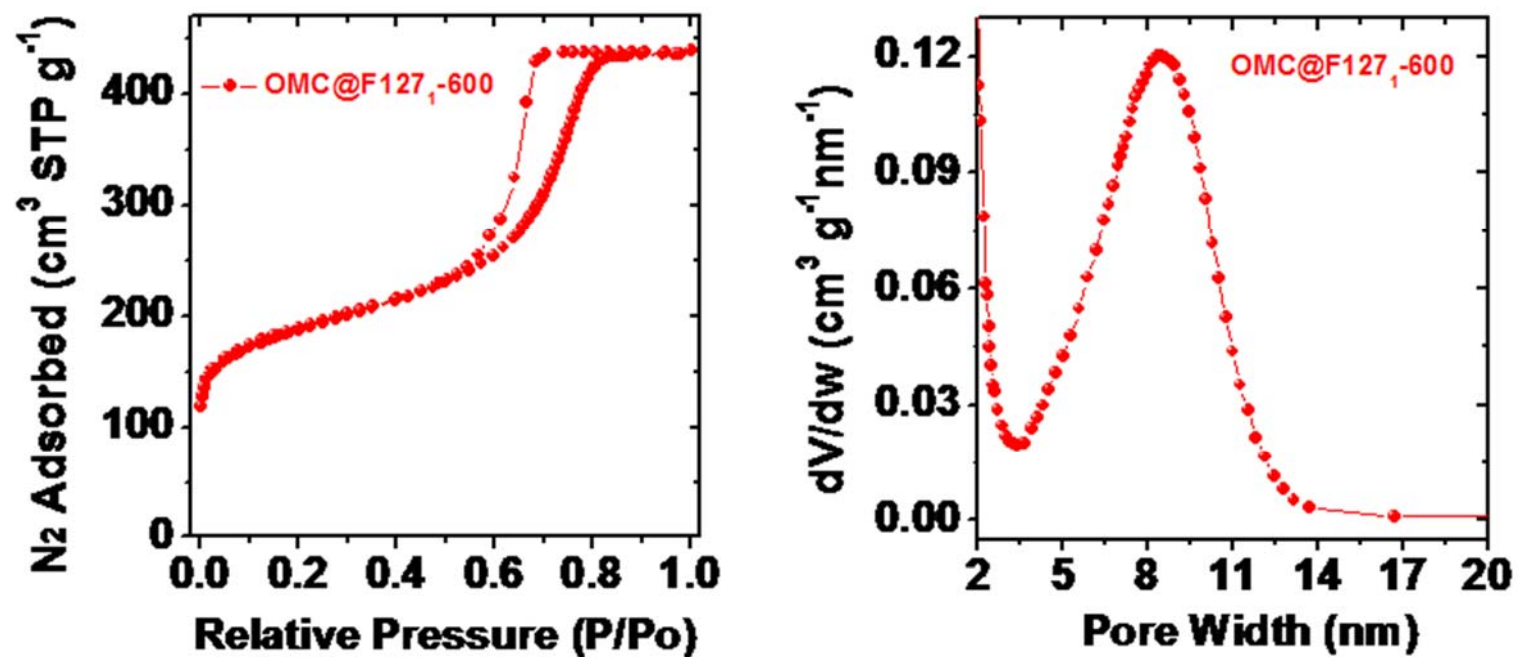

**Supplementary Figure 8.** Nitrogen adsorption-desorption isotherm of OMC@F127<sub>1</sub>-600 sample at 77 K. The pore size distribution is quite similar with the curve of OMC@F127<sub>1</sub>-450 sample. However, there is a clear increase on the N<sub>2</sub> uptake at low relative pressure (P/P<sub>0</sub>= 0-0.05), induced by the formation of more micropores within carbon walls during polymer decomposing.



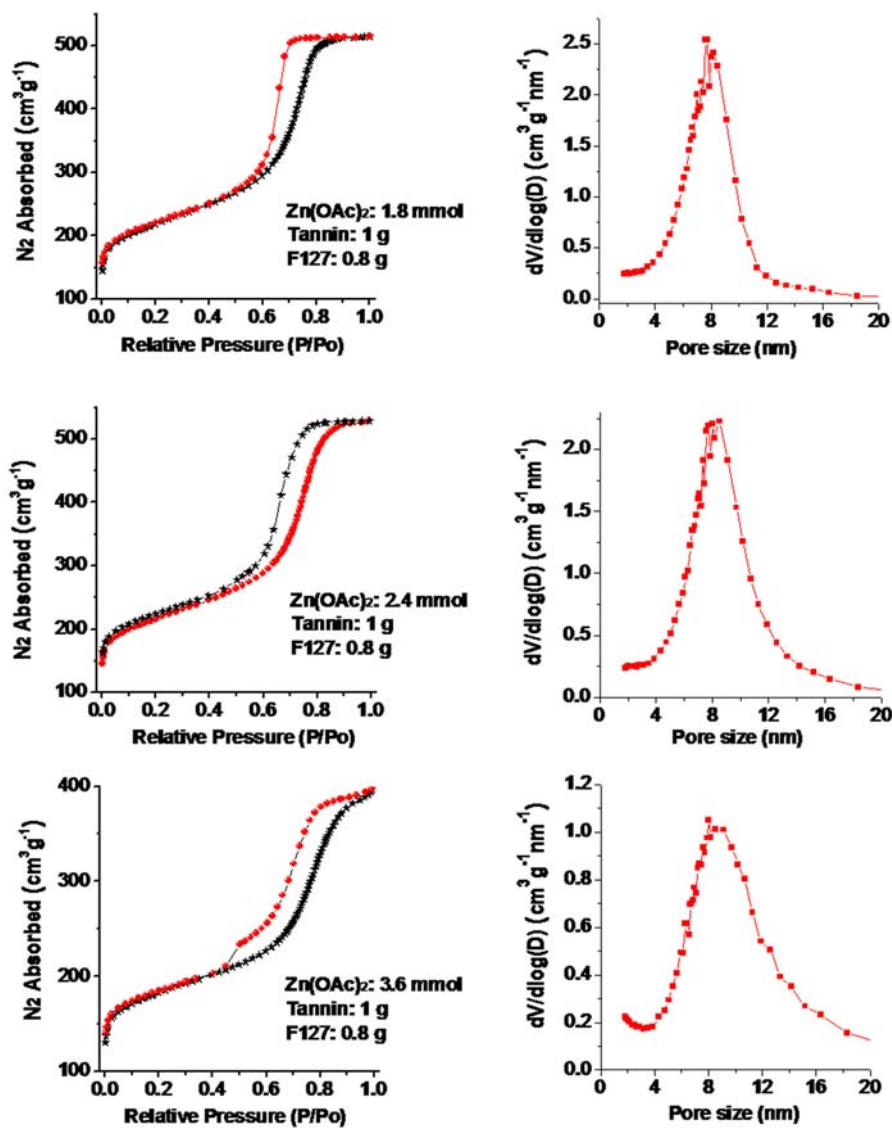

**Supplementary Figure 9.** Nitrogen adsorption-desorption isotherms of those carbons by different Zn(OAc)<sub>2</sub> amounts (calcination at 800°C). Zn(OAc)<sub>2</sub> (1.8, 2.4, 3.0 or 3.6 mmol) was added into the tannin-F127 composite (1g-1g) for coordination assembly. The specific surface areas of those carbon samples are 762, 753, 734 and 638 cm<sup>2</sup>g<sup>-1</sup>, respectively. The pore size distributions for Zn(OAc)<sub>2</sub> amounts of 1.8, 2.4 and 3.0 mmol are narrower than the one with 3.6 mmol Zn(OAc)<sub>2</sub>. Here, 3 mmol Zn(OAc)<sub>2</sub> is selected as an optimized amount since lower amounts will decrease the carbon yield due to an uncompleted coordination with tannin. The isotherm of the carbon with 3 mmol Zn(OAc)<sub>2</sub> is shown in Figure 2a-2b, Curve C.

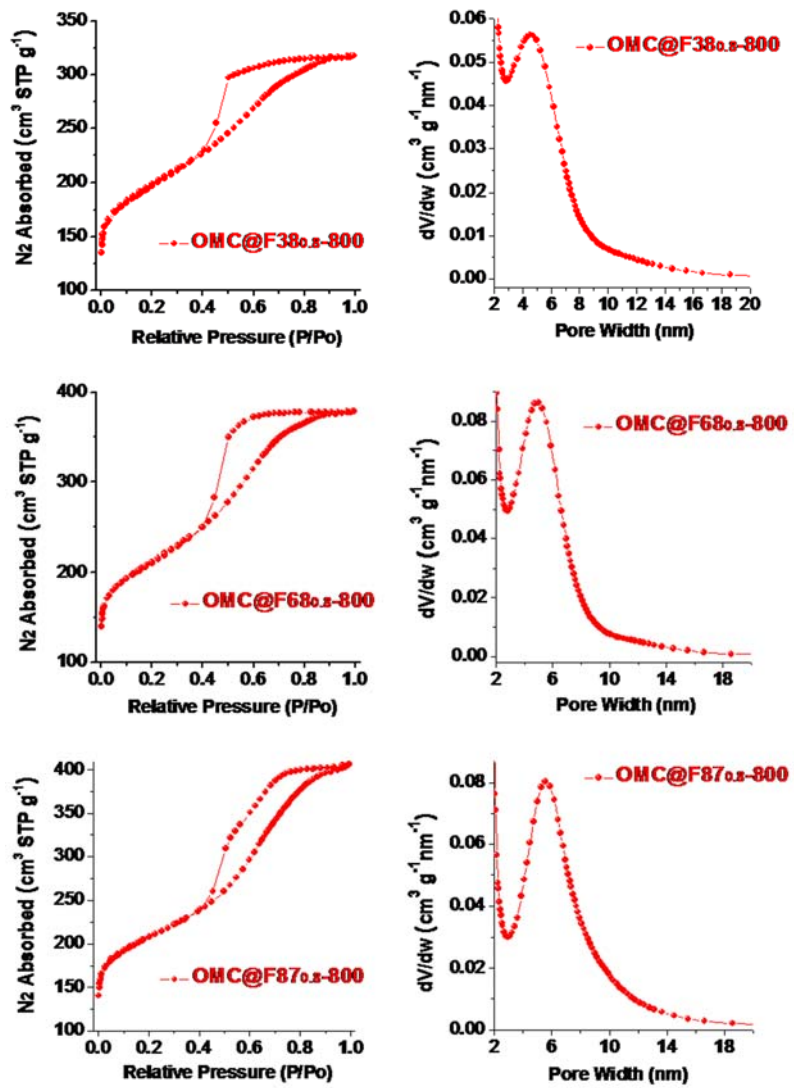

Supplementary Figure 10. Nitrogen adsorption-desorption isotherms and pore size distributions of carbon samples from F-series copolymers.

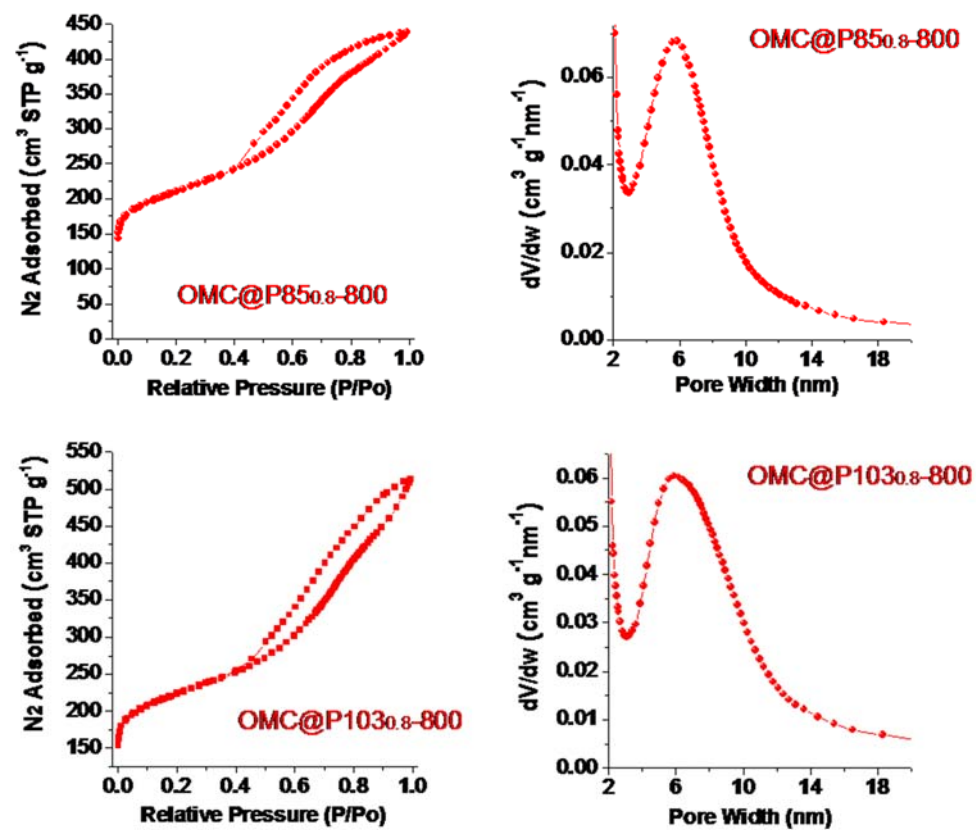

**Supplementary Figure 11.** Nitrogen adsorption-desorption isotherms (77 K) and pore size distributions of carbon samples templated by P85 and P103.

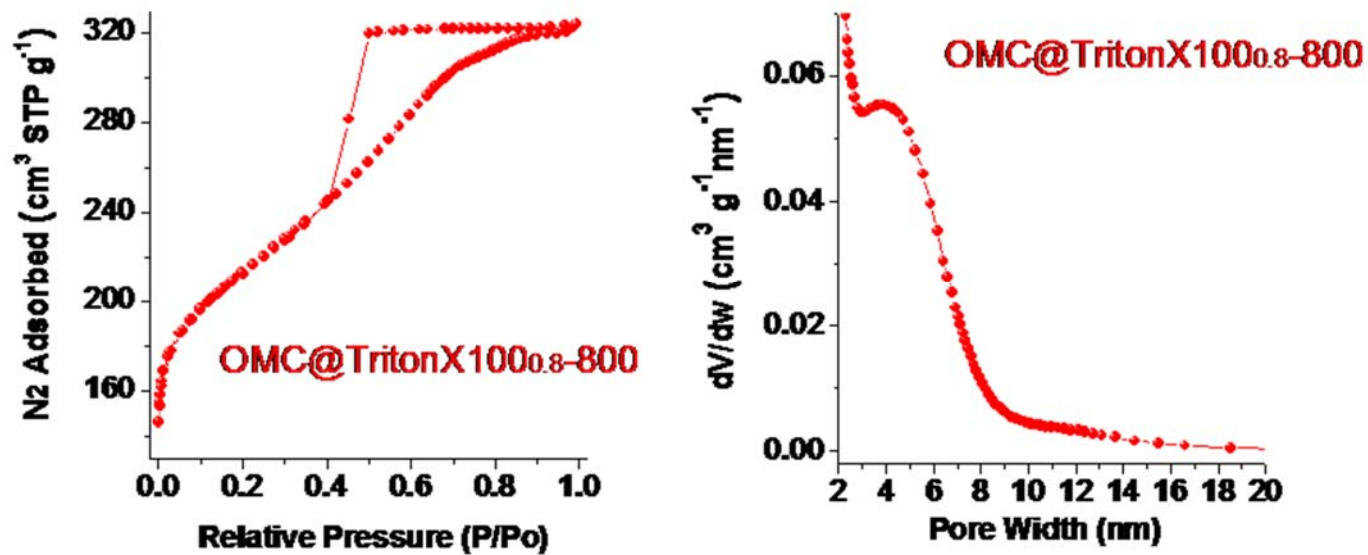

**Supplementary Figure 12.** The nitrogen adsorption-desorption isotherm (77 K) and pore size distribution of carbon sample by Triton X-100 surfactant. The isotherm curve presents a type IV hysteresis with a condensation step around  $P/P_0=0.5$ , while the pore size is centered at  $\sim 5$  nm.

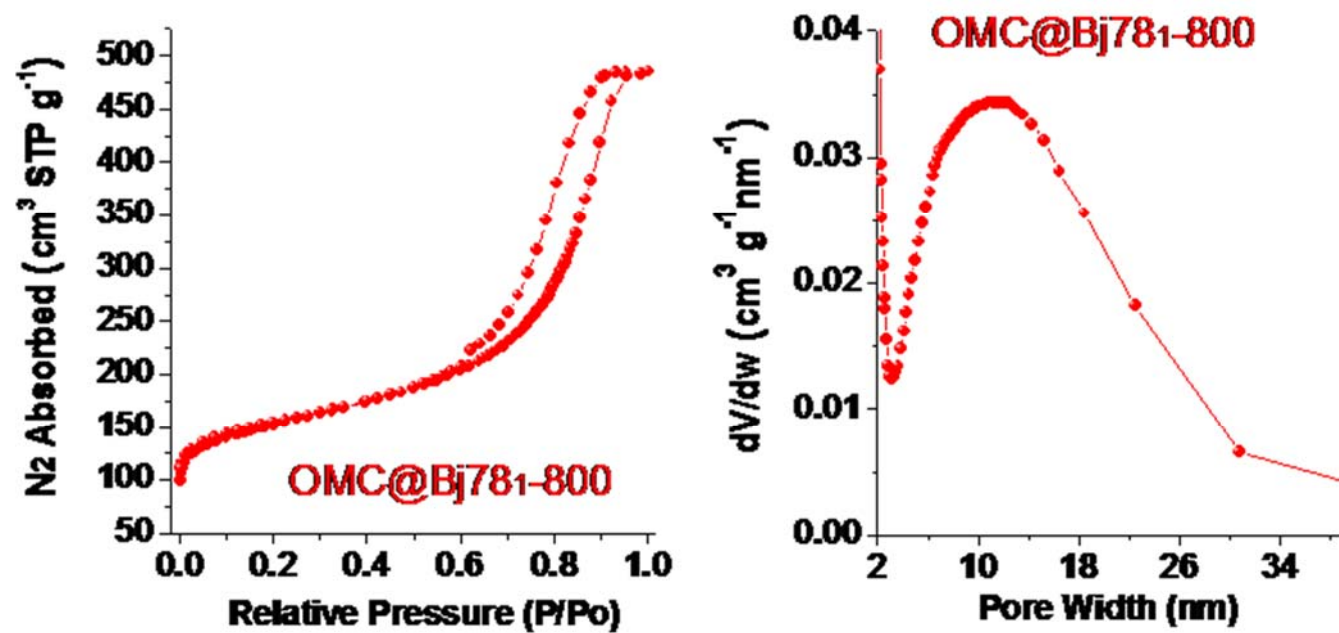

**Supplementary Figure 13.** The nitrogen adsorption-desorption isotherm (77 K) and pore size distribution of carbon sample with Brij-78 surfactant. The OMC@Bj78<sub>1</sub>-800 sample shows a very broad pore size from 5 to 30 nm, suggesting the poor ordered textural structure.

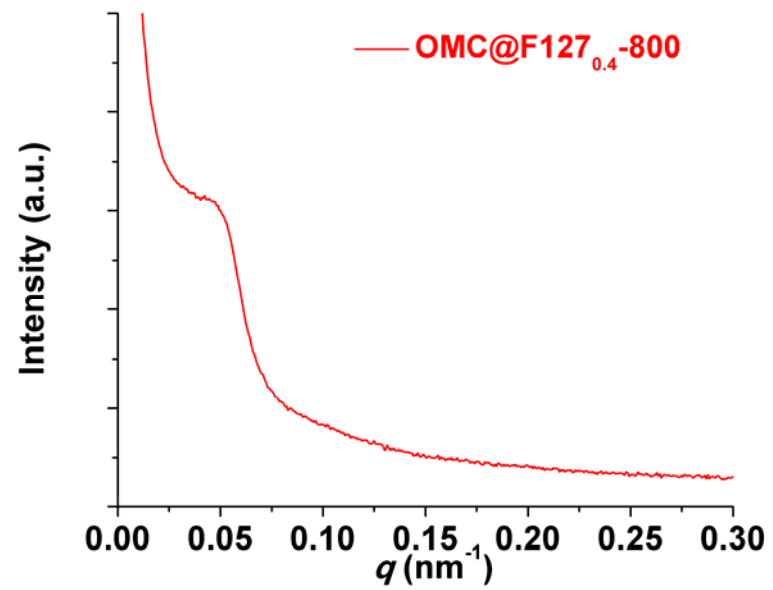

**Supplementary Figure 14.** SAXS pattern of OMC@F127<sub>0.4</sub>-800 sample.

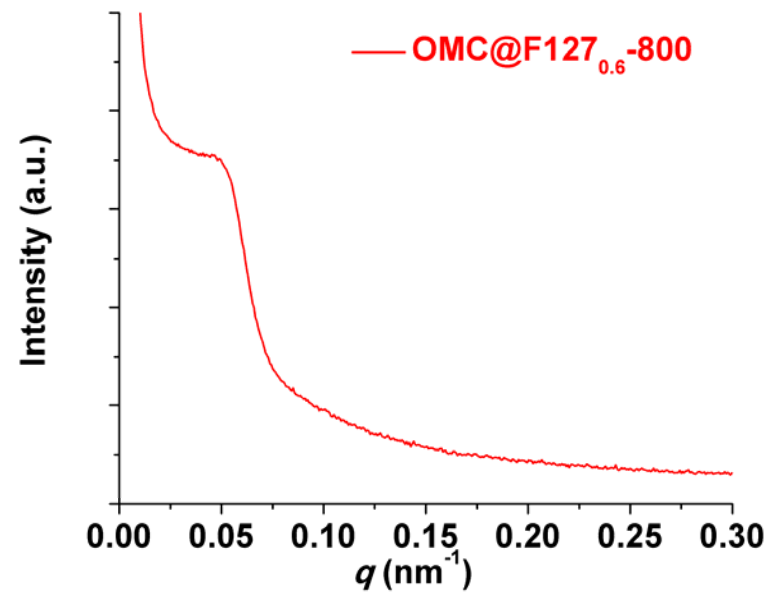

**Supplementary Figure 15.** SAXS pattern of OMC@F127<sub>0.6</sub>-800 sample.

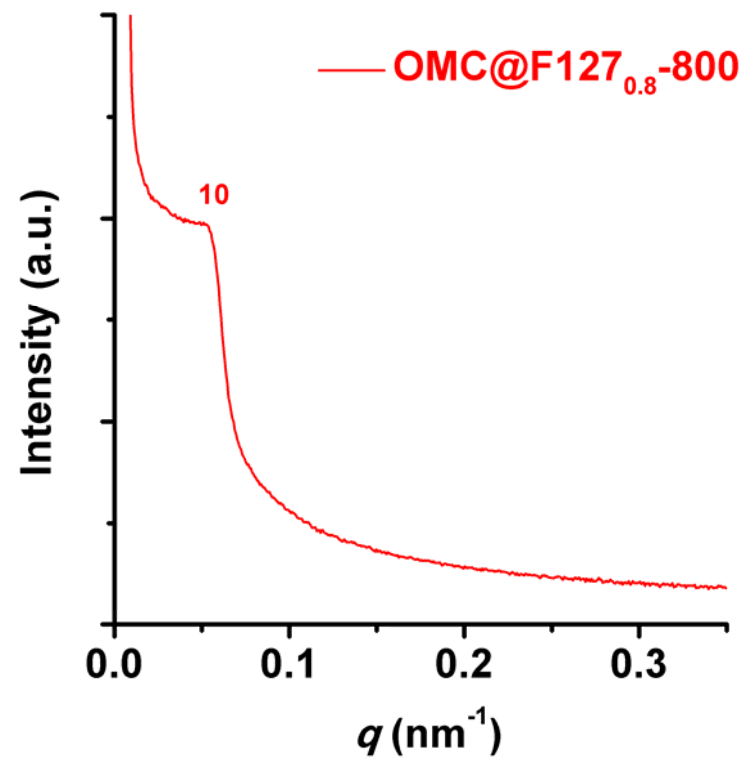

**Supplementary Figure 16.** SAXS pattern of OMC@F127<sub>0.8</sub>-800 sample.



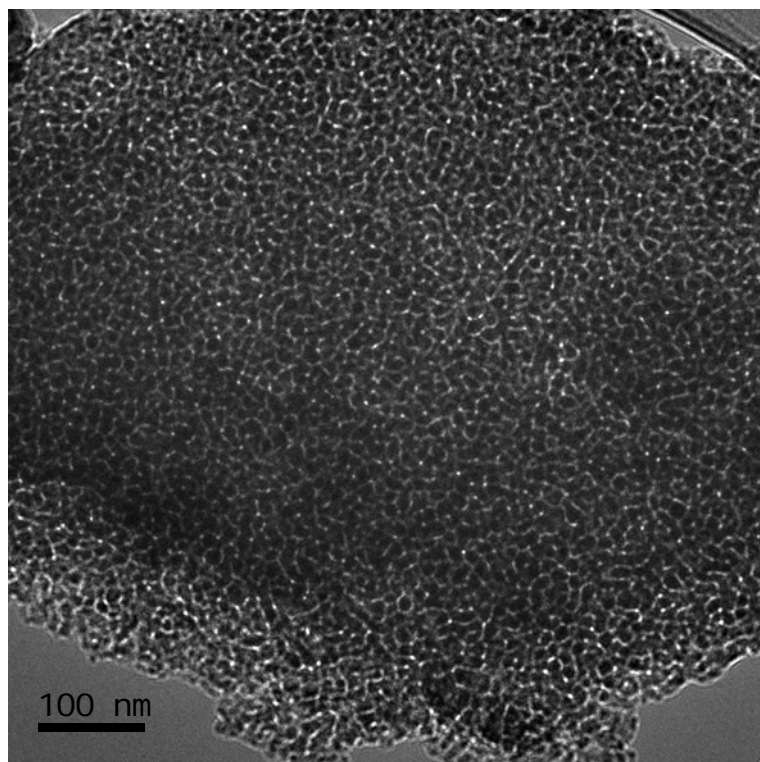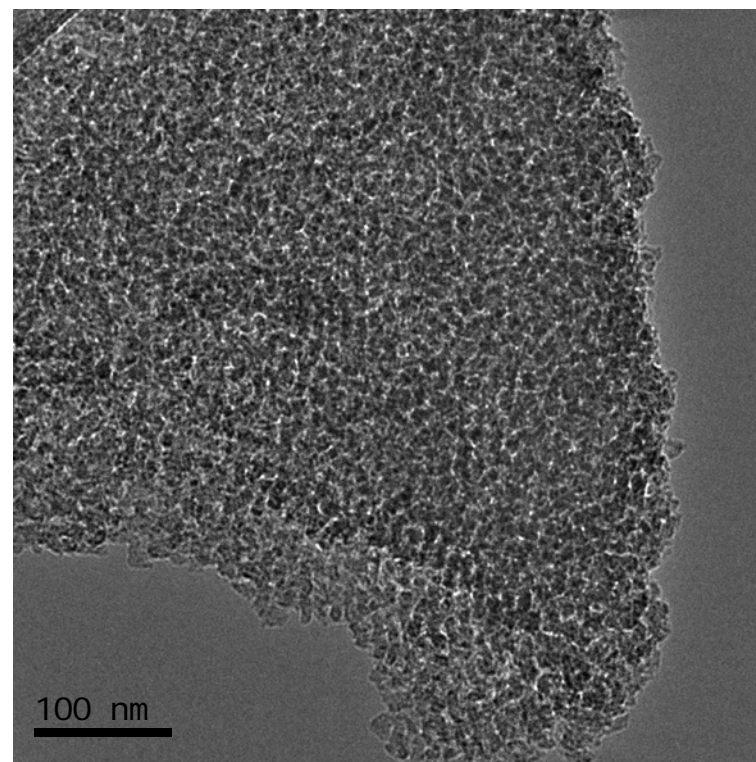

**Supplementary Figure 17.** TEM images of OMC@F127<sub>1</sub>-800 sample.

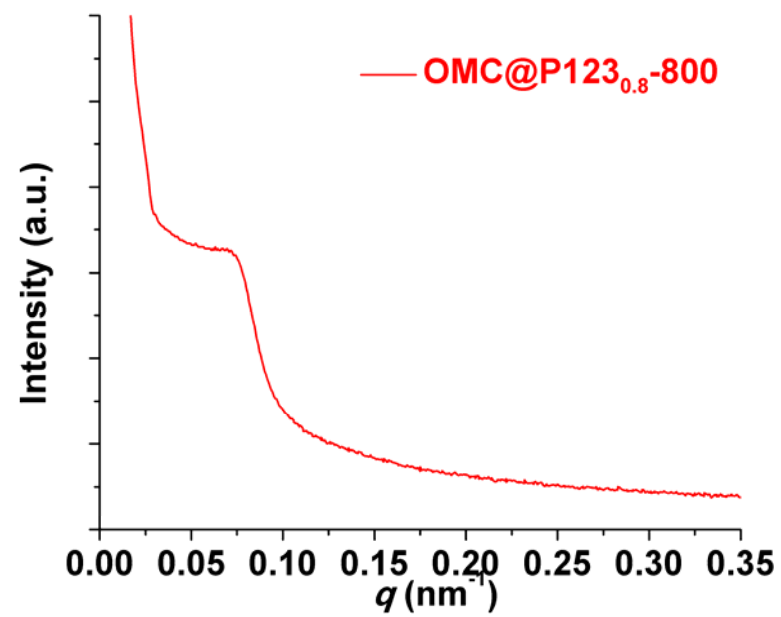

**Supplementary Figure 18.** SAXS pattern of OMC@P123<sub>0.8</sub>-800 sample.

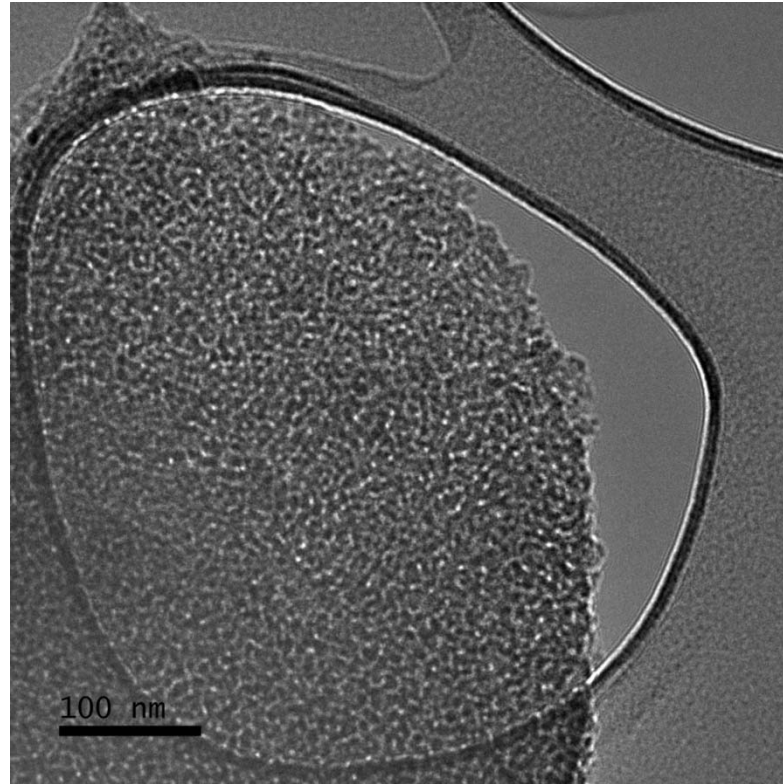

**Supplementary Figure 19.** A typical TEM image of OMC@TritonX-100<sub>0.8</sub>-800 sample.

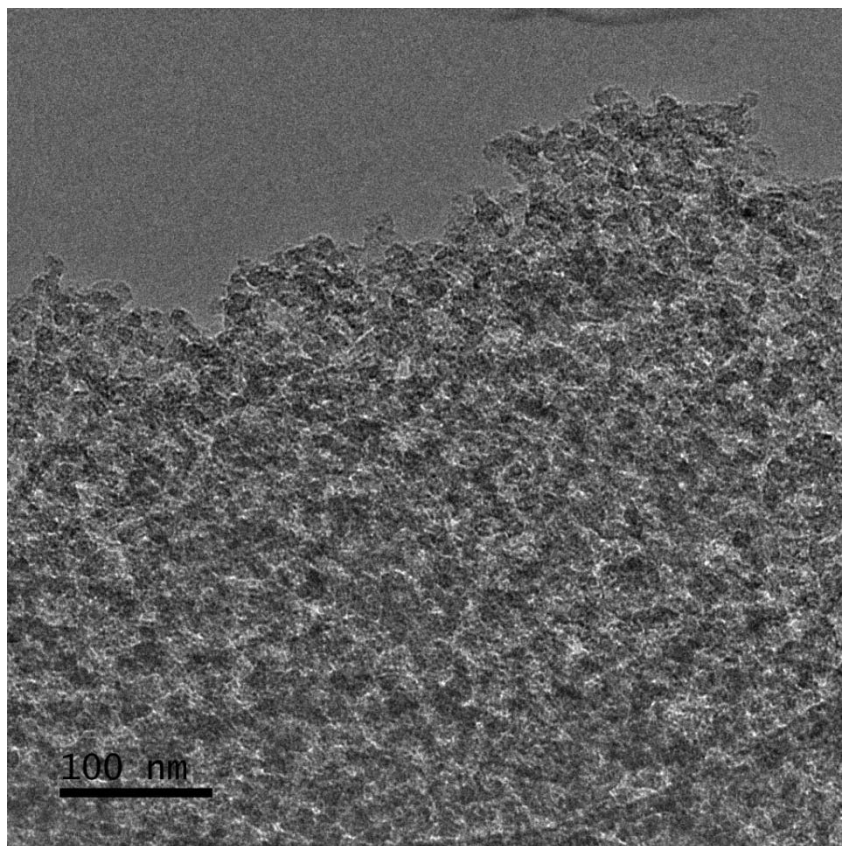

**Supplementary Figure 20.** A typical TEM image of OMC@Bj781-800 sample.

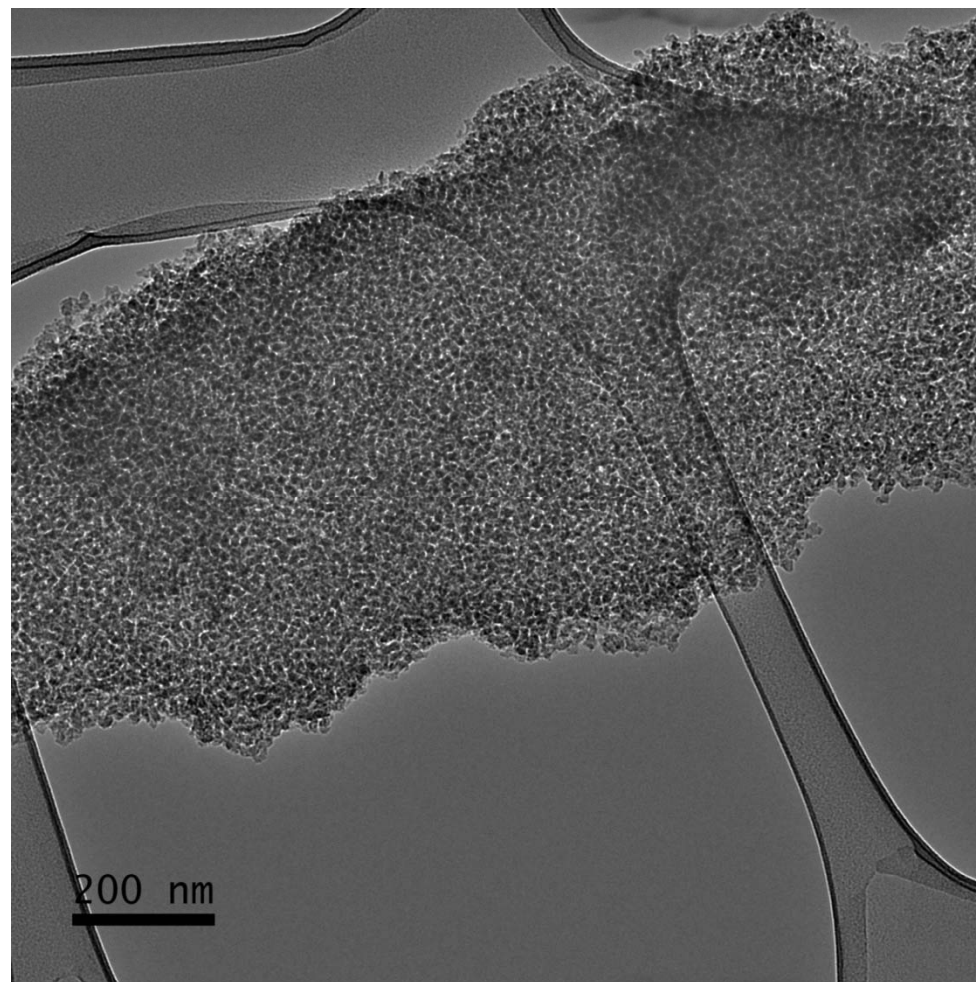

**Supplementary Figure 21.** A typical TEM image of OMC@(F127-Ph<sub>3</sub>P)<sub>0.8</sub>-800.

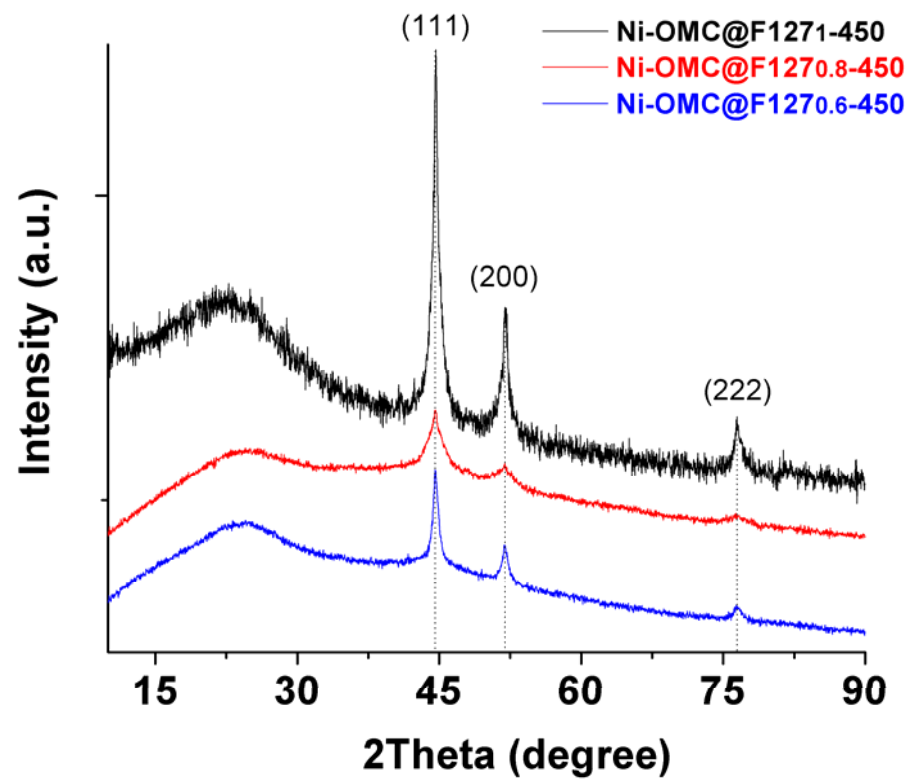

**Supplementary Figure 22.** XRD patterns of Ni-OMC@F127<sub>1</sub>-450, Ni-OMC@F127<sub>0.8</sub>-450 and Ni-OMC@F127<sub>0.6</sub>-450. The average crystalline size by Scherrer's equation are 17.3, 5.7 and 12.3 nm for Ni-OMC@F127<sub>1</sub>-450, Ni-OMC@F127<sub>0.8</sub>-450 and Ni-OMC@F127<sub>0.6</sub>-450 samples. Patterns were vertically offset for clarity

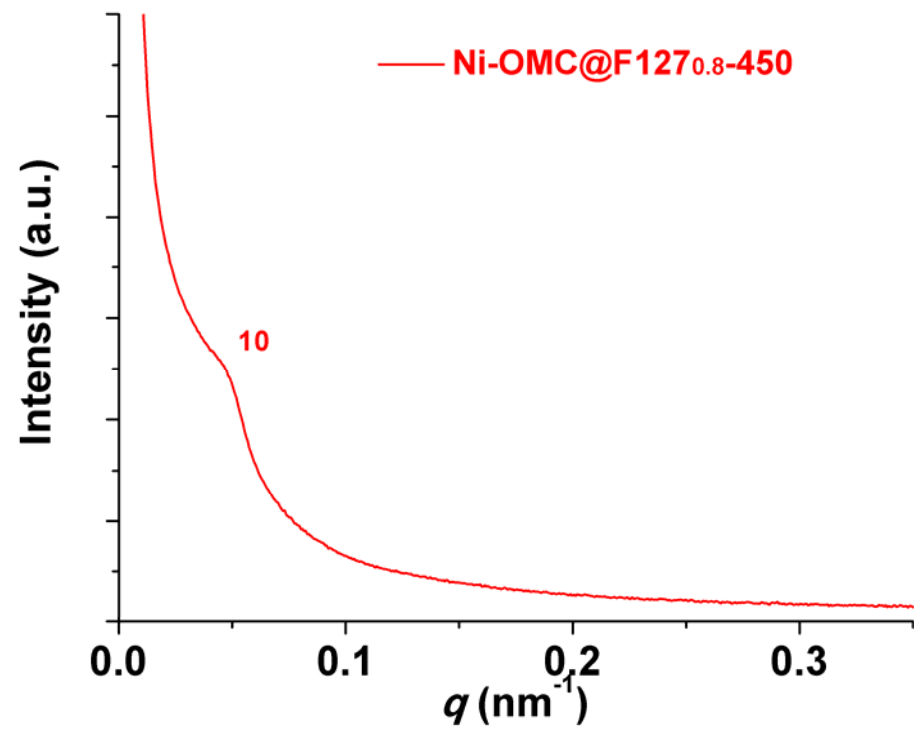

**Supplementary Figure 23.** SAXS pattern of Ni-OMC@F127<sub>0.8</sub>-450 sample.

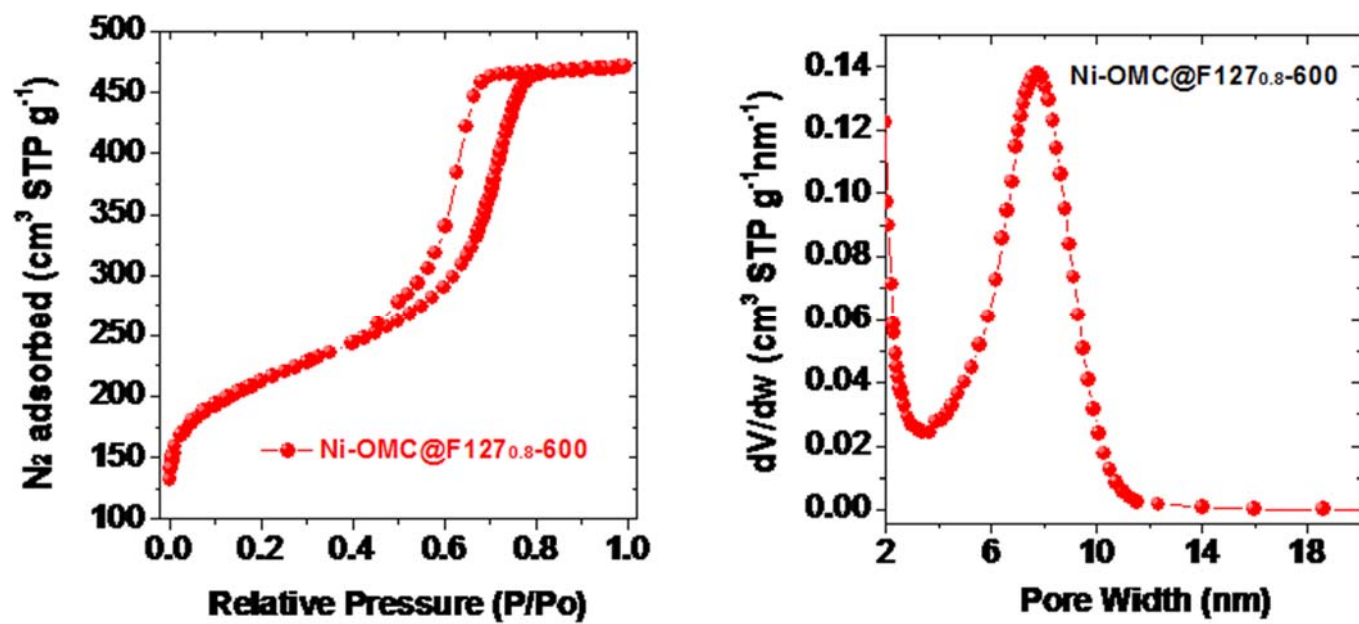

Supplementary Figure 24. 77 K nitrogen adsorption-desorption isotherm of Ni-OMC@F127<sub>0.8</sub>-600 sample.



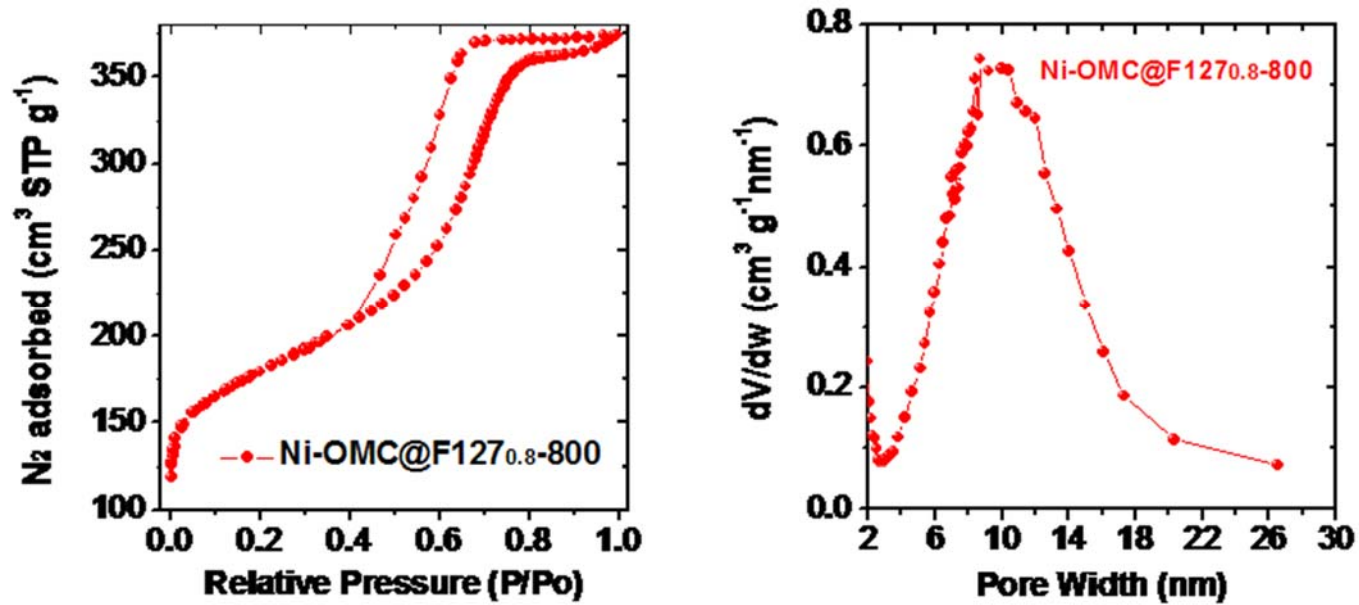

Supplementary Figure 25. The nitrogen adsorption-desorption isotherm (77 K) and pore size distribution of Ni-OMC@F127<sub>0.8</sub>-800 sample.

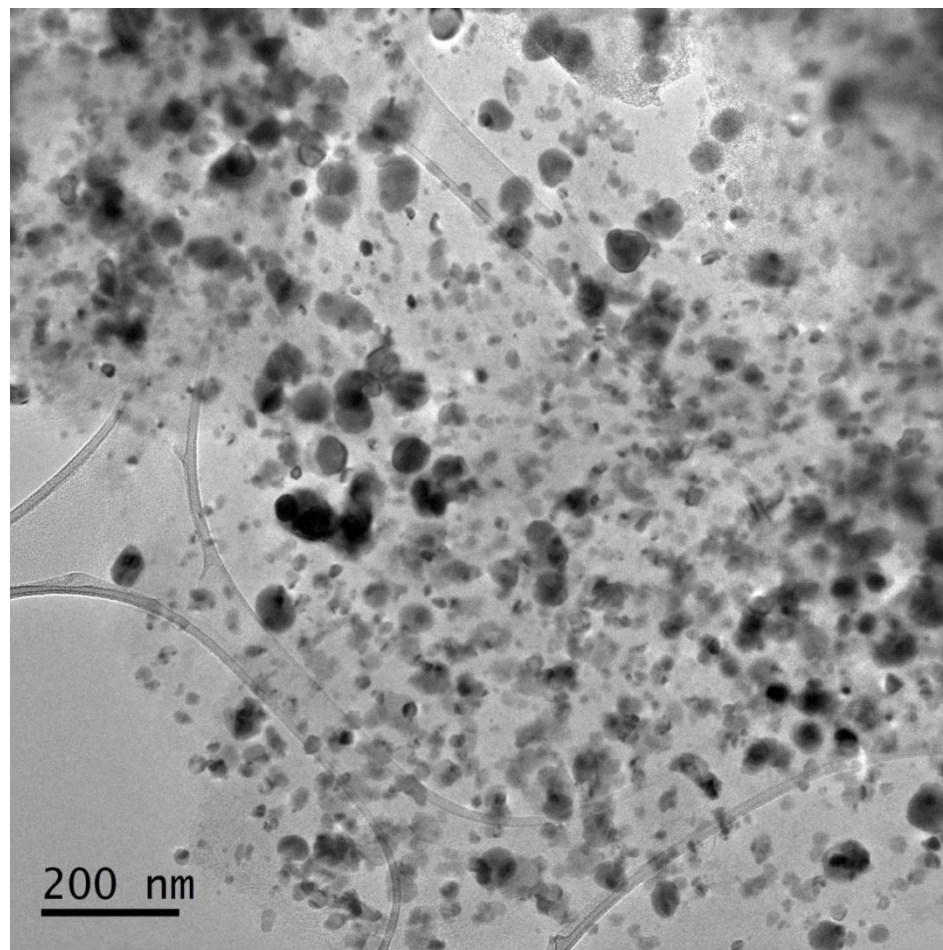

**Supplementary Figure 26.** TEM image of Ni-AC@450, a control sample with Ni supported on activated carbon by thermal treatment at 450°C. The Ni NPs aggregate critically with many Ni particles even bigger than 50 nm.

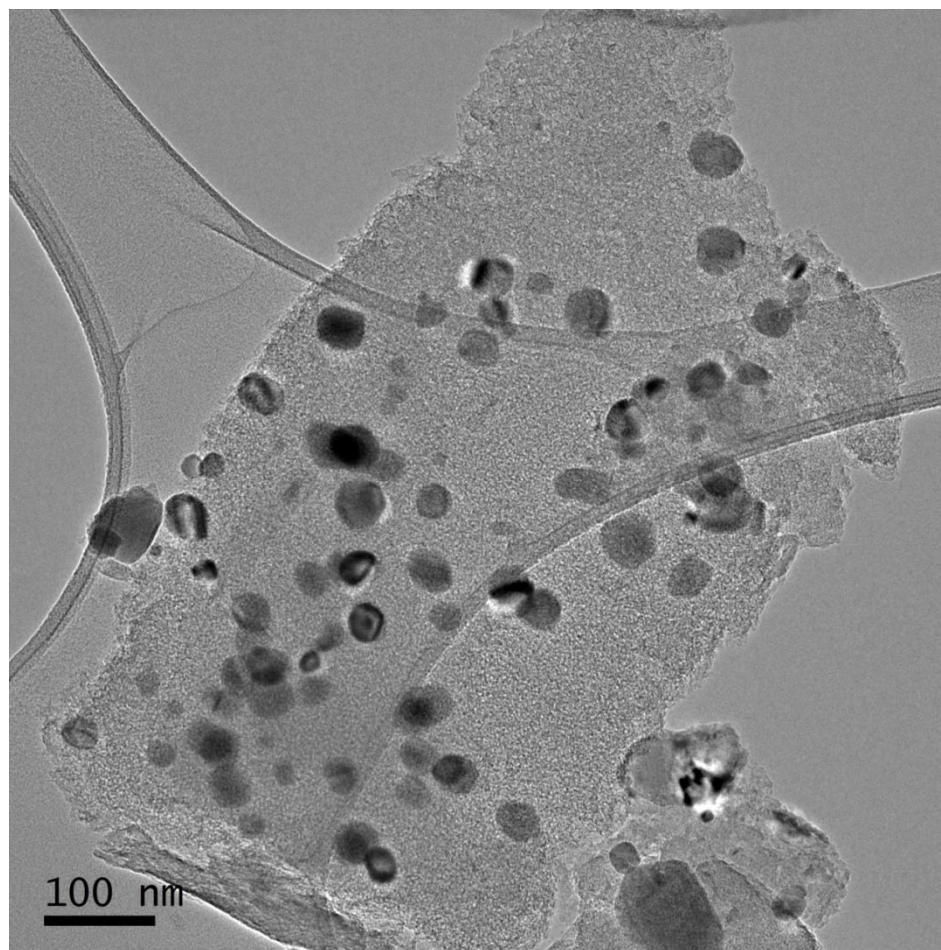

**Supplementary Figure 27.** TEM image of Ni-AC@800, a control sample with Ni supported on activated carbon by thermal treatment at 800°C. A serious growth of Ni NPs occurs. All Ni particles are bigger than 50 nm, and some are even bigger than 100 nm.

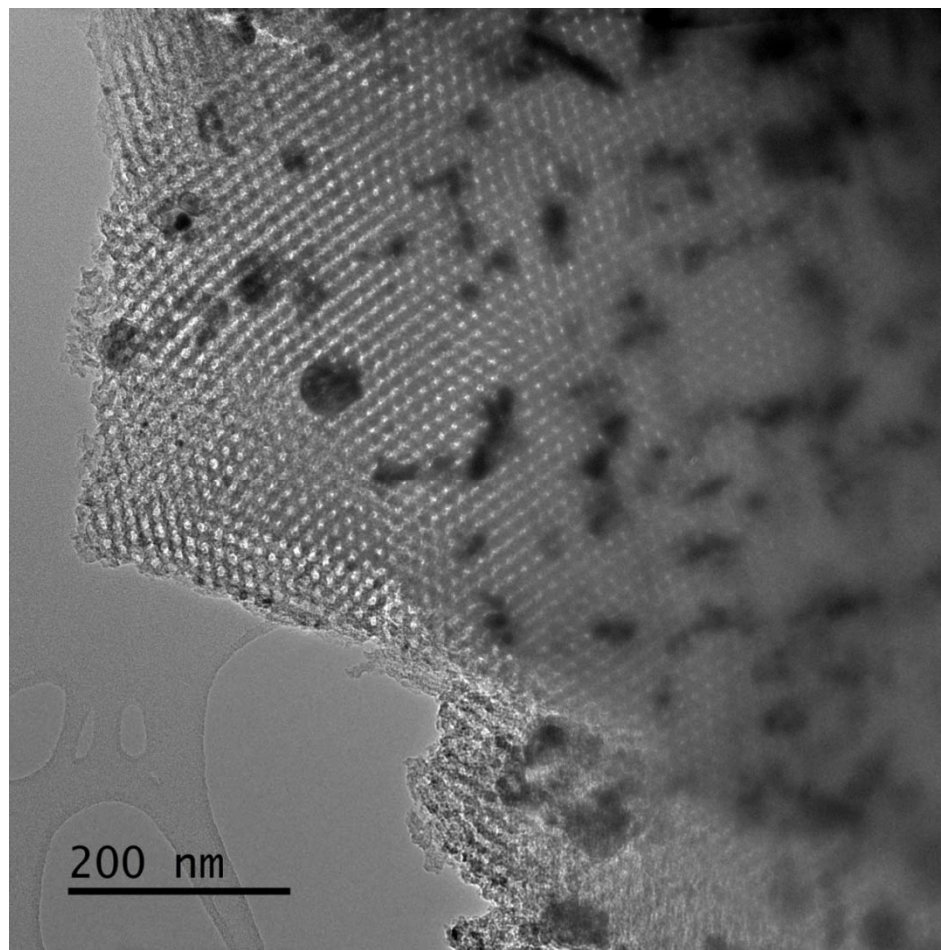

**Supplementary Figure 28.** TEM image of Ni-ST-OMC@450, a control sample with Ni supported on traditional soft-templating carbon by thermal treatment at 450°C. Some Ni particles are located in mesoporous channels; however, many Ni particles have already grown to a big size above 50 nm.

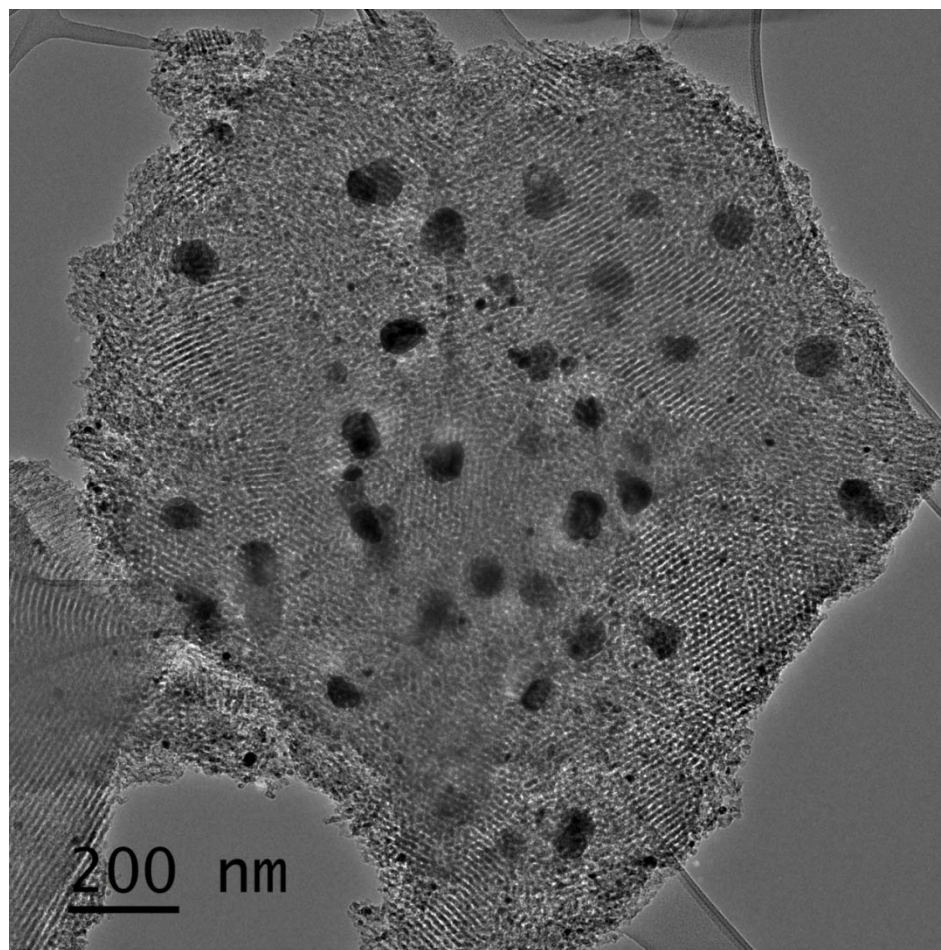

**Supplementary Figure 29.** TEM image of Ni-ST-OMC@800, a control sample with Ni supported on traditional soft-templating carbon by 800°C treatment.

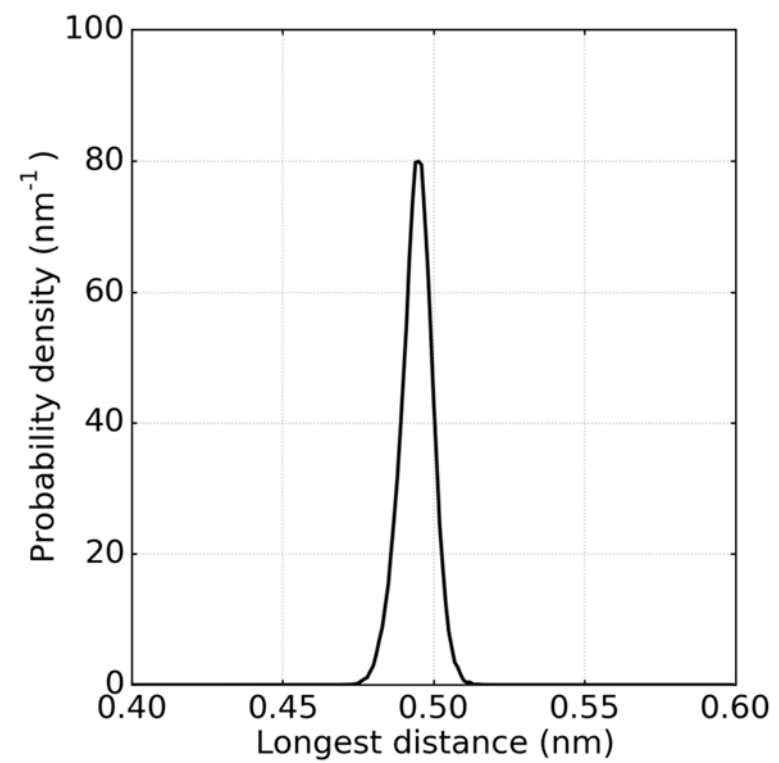

**Supplementary Figure 30.** A MD simulation of cyclohexene in vacuum.

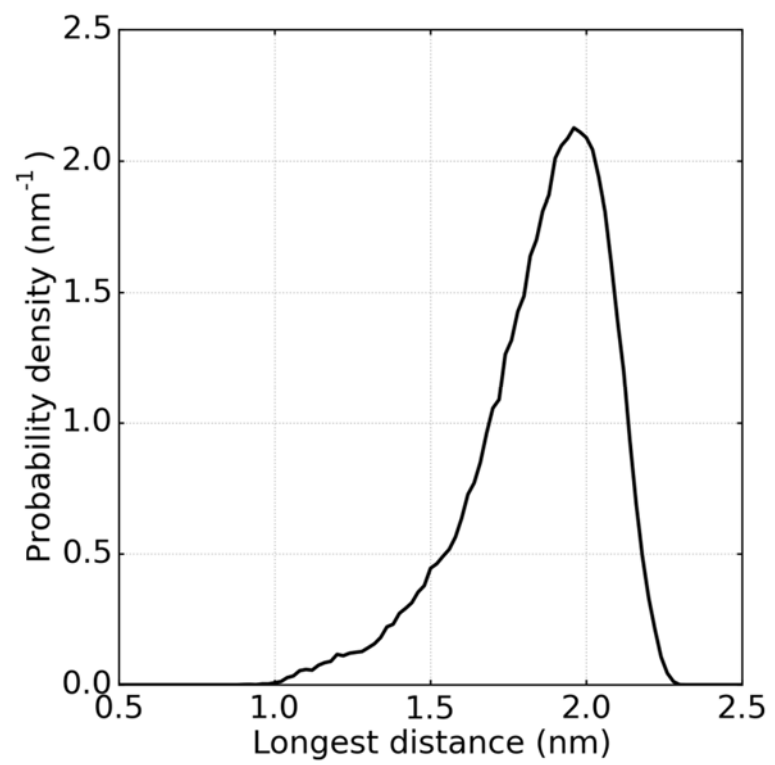

**Supplementary Figure 31.** A MD simulation of 1-octadecene in vacuum.

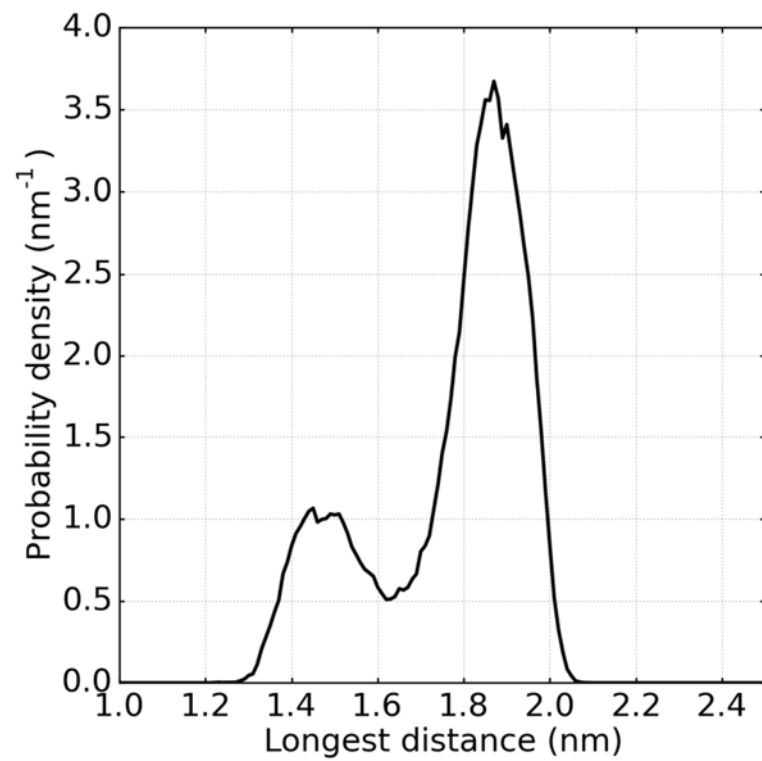

**Supplementary Figure 32.** A MD simulation of cholesteryl acetate in vacuum.



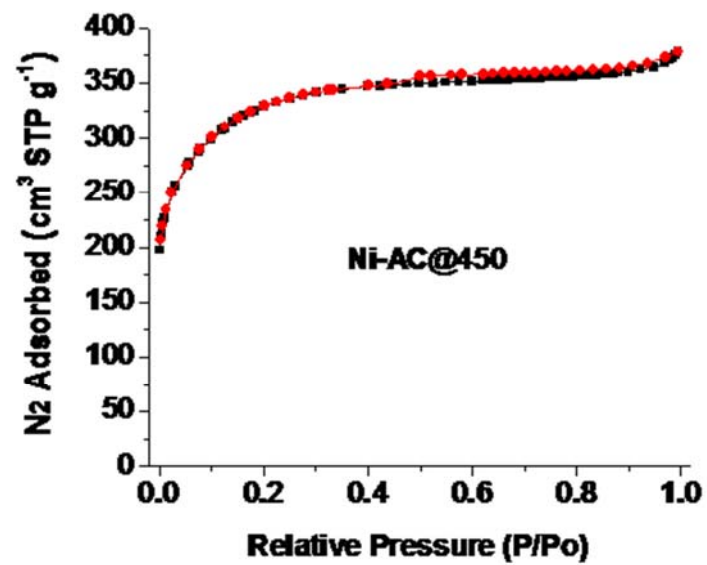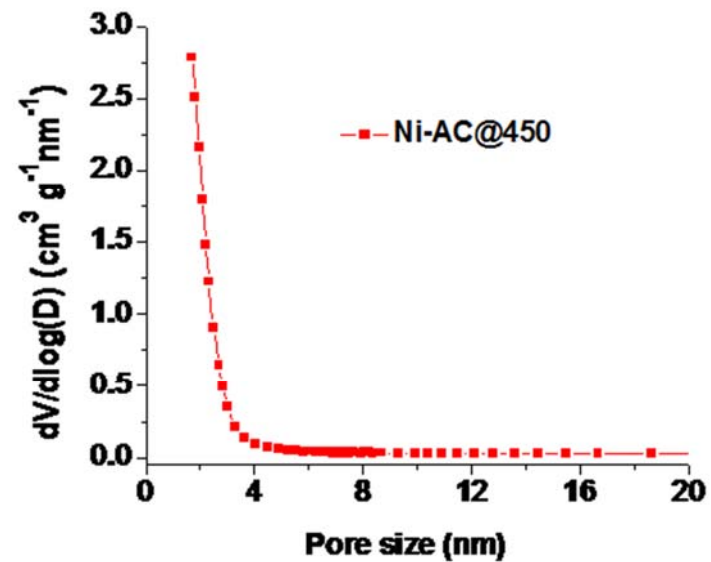

**Supplementary Figure 33.** The N<sub>2</sub> adsorption-desorption isotherm (77 K) and the corresponding pore size distribution of Ni-AC@450. The BET specific surface area is 1154 m<sup>2</sup>g<sup>-1</sup>.

**Supplementary Table 1.** The relationship between pore size and F-series surfactants used in the assembly.

|                               | F38 | F68  | F87  | F88  | F127 |
|-------------------------------|-----|------|------|------|------|
| Molecular Weight of PPO Chain | 950 | 1750 | 2250 | 2250 | 4000 |
| Pore Size (nm)                | 5.3 | 5.3  | 5.9  | 5.7  | 6.9  |

**Supplementary Table 2.** Selective Hydrogenation of Different Molecules by Ni Catalysts. <sup>a</sup>

| Entry | Substrate                                                                         | Product                                                                            | Time (h) | Conv. | Sel. |
|-------|-----------------------------------------------------------------------------------|------------------------------------------------------------------------------------|----------|-------|------|
| 1     |  |  | 2        | 57    | >99  |
| 2     |  |  | 2        | 91    | >99  |
| 3     |  |  | 2.5      | 97    | >99  |
| 4     |  |  | 1.5      | >99   | >99  |

<sup>a</sup> Reaction Condition: substrate 1 mmol, ethanol 3 mL, Ni-OMC@F127<sub>0.8</sub>-450 catalyst 10 mg, H<sub>2</sub> 3 Mpa.

**Supplementary Table 3.** Selective hydrogenation of cyclohexene by recycled Ni catalyst. <sup>a</sup>

| Run   | Fresh | 1st Reused | 2nd Reused | 3rd Reused | 4th Reused | 5th Reused |
|-------|-------|------------|------------|------------|------------|------------|
| Yield | 98    | 98         | 95         | 95         | 97         | 95         |

<sup>a</sup> Reaction Condition: cyclohexene 1 mmol, ethanol 3 mL, Ni-OMC@F127<sub>0.8</sub>-450 catalyst (fresh or recycled), H<sub>2</sub> 3 Mpa, 2 h.

**Supplementary Table 4.** A brief comparison of different methods for OMCs.

|           | Soft Template Method                       | Our Method                    |
|-----------|--------------------------------------------|-------------------------------|
| Reaction  | Organic Poly-Condensation                  | Coordination Polymerization   |
| Process   | Solution-based<br>Processing for Membranes | Solvent-free Mechanochemistry |
| Precursor | Phenol-Aldehyde                            | Biomass-derived Tannin        |
| Time      | 1-3 days                                   | 1 hour                        |
| Product   | Pure OMCs                                  | Pure OMCs or Metal-OMCs       |

### **Supplementary Note 1:**

Simulation setup: Molecular dynamics simulations of the reactants in the vacuum were performed using MD package GROMACS<sup>1</sup> in the NVT ensemble. The temperature of was maintained at 298 K using a Nosé–Hoover thermostat<sup>2</sup>. The OPLS-AA<sup>3,4</sup> force field was adopted for the reactants in this study. Each molecule was put in a cubic simulation box, and the initial configuration was generated by PRODRG<sup>5</sup>. Periodic boundary conditions were applied in all three directions. The electrostatic interactions were computed using the particle mesh Ewald method<sup>6</sup> with a 1.1 nm cutoff distance for real space. The van der Waals interaction was computed by direct summation with a cutoff distance of 1.1 nm. The LINCS algorithm<sup>7</sup> was used to maintain the bond lengths in each reactant. The system was first equilibrated for 5 ns, and then followed by a production run of 5 ns. A 1 fs time step was used and the trajectories were saved every 100 fs. For each frame of the trajectory, the maximum distance between 2 atoms was calculated. The distribution of the longest distance of the molecule over the entire trajectory was hence obtained by using the method of histogram.

## Supplementary References

1. Hess, B., Kutzner, C., Van Der Spoel, D. & Lindahl, E. GRGMACS 4: Algorithms for highly efficient, load-balanced, and scalable molecular simulation. *J. Chem. Theory Comput.* **4**, 435–447 (2008).
2. Hoover, W. G. Canonical dynamics: Equilibrium phase-space distributions. *Phys. Rev. A* **31**, 1695–1697 (1985).
3. Jorgensen, W. L., Maxwell, D. S. & Tirado-Rives, J. Development and testing of the OPLS all-atom force field on conformational energetics and properties of organic liquids. *J. Am. Chem. Soc.* **118**, 11225–11236 (1996).
4. Price, M. L. P., Ostrovsky, D. & Jorgensen, W. L. Gas-phase and liquid-state properties of esters, nitriles, and nitro compounds with the OPLS-AA force field. *J. Comput. Chem.* **22**, 1340–1352 (2001).
5. Schüttelkopf, A. W. & Van Aalten, D. M. F. PRODRG: A tool for high-throughput crystallography of protein-ligand complexes. *Acta Crystallogr. Sect. D Biol. Crystallogr.* **60**, 1355–1363 (2004).
6. Essmann, U. *et al.* A smooth particle mesh Ewald method. *J Chem Phys* **103**, 8577–8593 (1995).
7. Hess, B., Bekker, H., Berendsen, H. J. C. & Fraaije, J. G. E. M. LINCS: A linear constraint solver for molecular simulations. *J. Comput. Chem.* **18**, 1463–1472 (1997).
